# Supplementary material for: Gold(III) Complexation in the Presence of the Macropolyhedral Hydridoborate Cluster [B20H18]2−
Source: MDPI journal article supplement (doi:10.3390/inorganics10070099), 2022-07-10
Supplement: s1 [file s1]

# Gold(III) complexation in the presence of the macropolyhedral hydridoborate cluster $[B_{20}H_{18}]^{2-}$

Varvara V. Avdeeva, Anna V. Vologzhanina, Alexey S. Kubasov, Nailya S. Akhmadullina, Oleg N. Shishilov, Elena A. Malinina, Nikolay T. Kuznetsov

## SUPPORTING INFORMATION

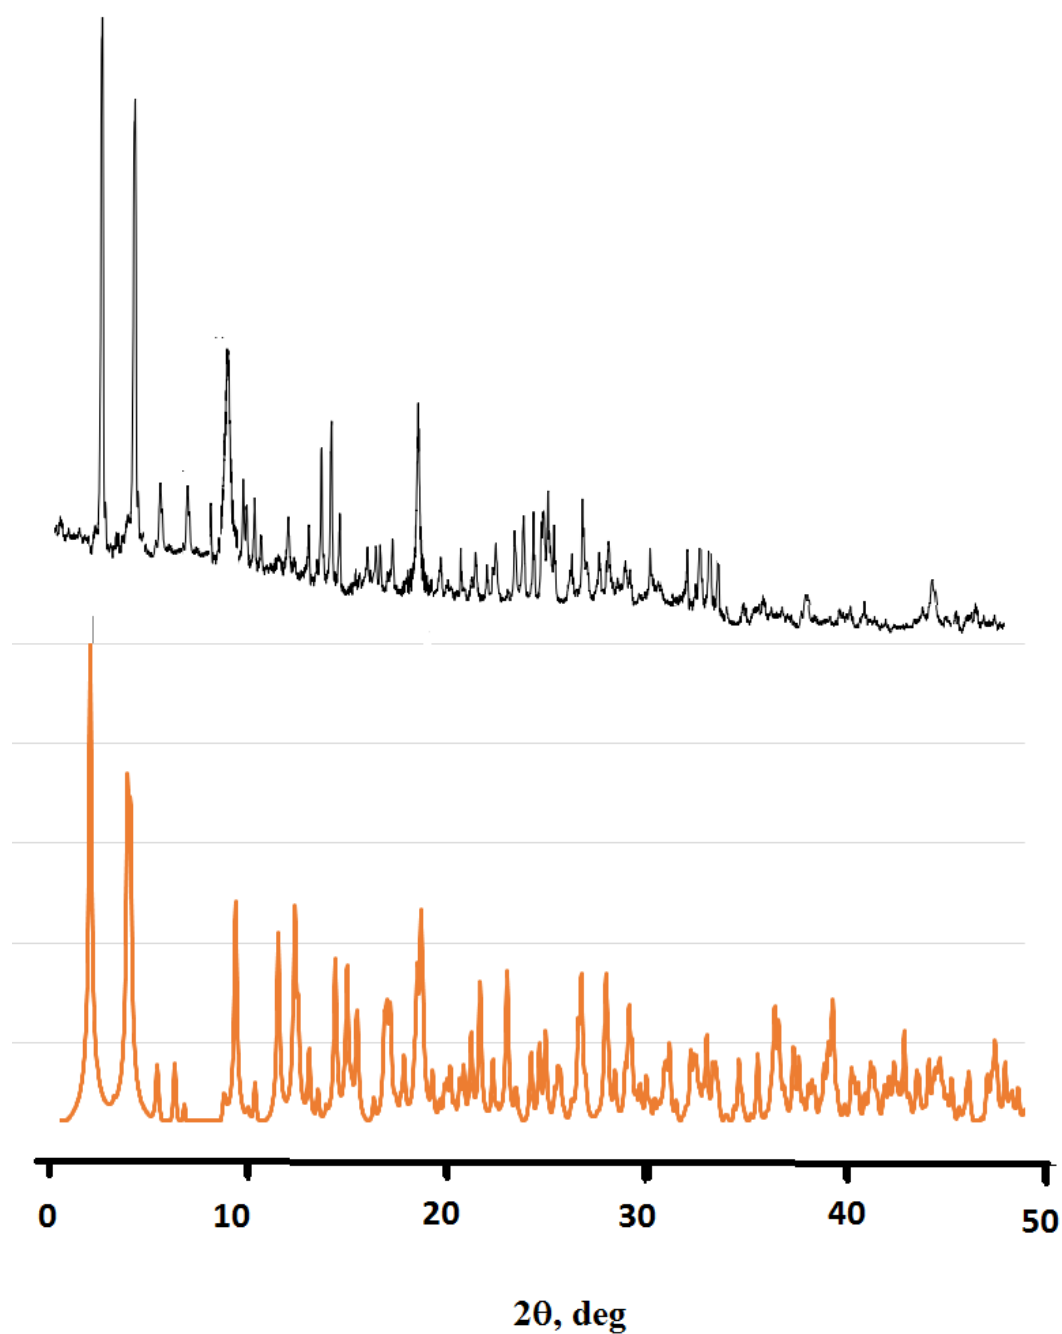

**Figure S1.** Calculated (orange) and experimental (black) X-ray powder diffraction patterns of complex  $1 \cdot 2CH_3CN$ .

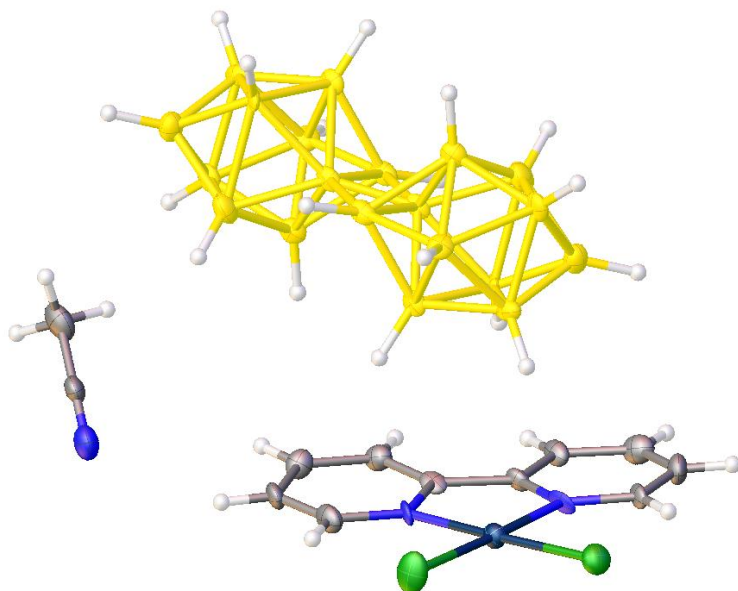

**Figure S2.** Molecular view of **1·2CH<sub>3</sub>CN** in representation of atoms with thermal ellipsoids ( $p = 50\%$ ).

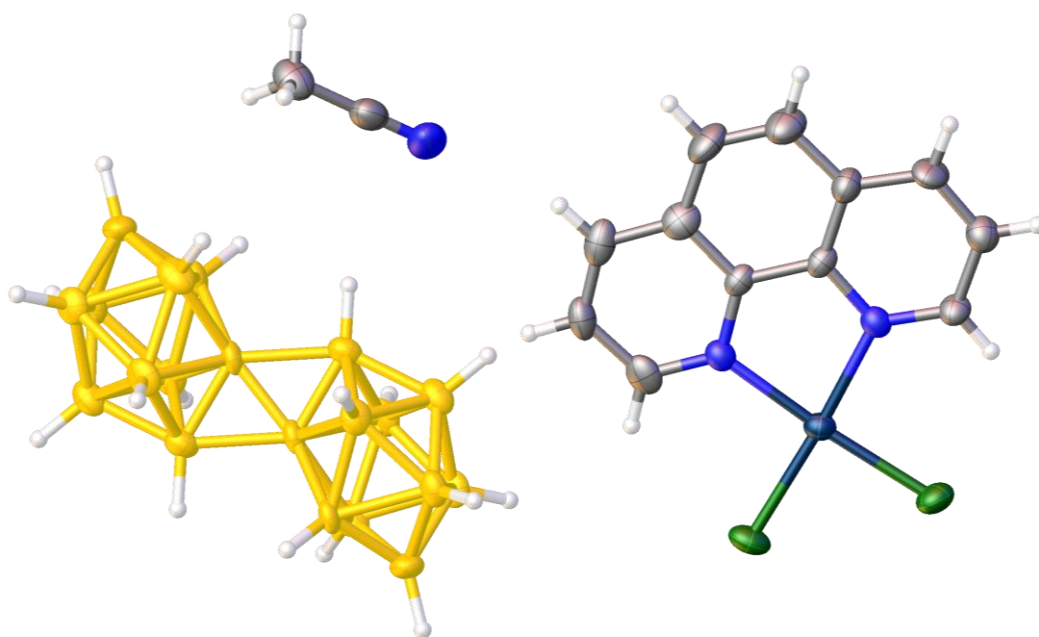

**Figure S3.** Molecular view of **2·2CH<sub>3</sub>CN** in representation of atoms with thermal ellipsoids ( $p = 50\%$ ).

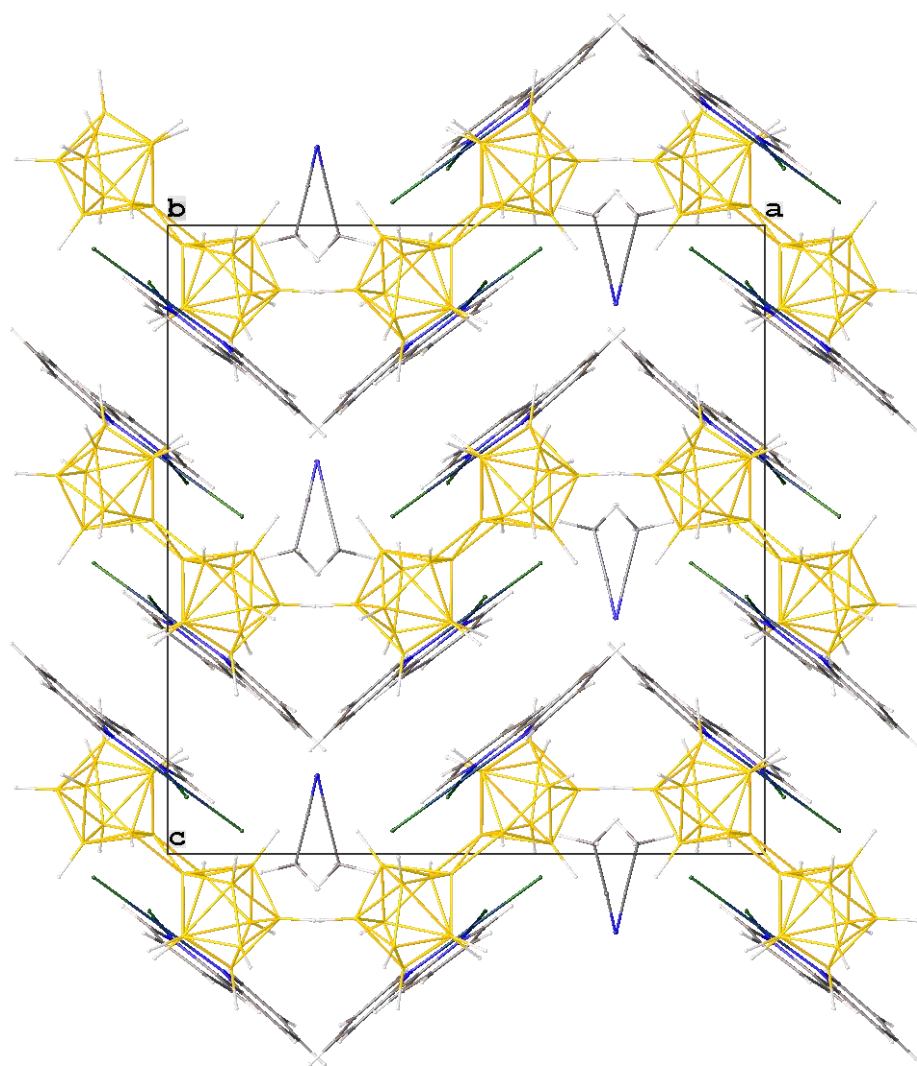

**Figure S4.** Crystal packing of 1·2CH<sub>3</sub>CN.

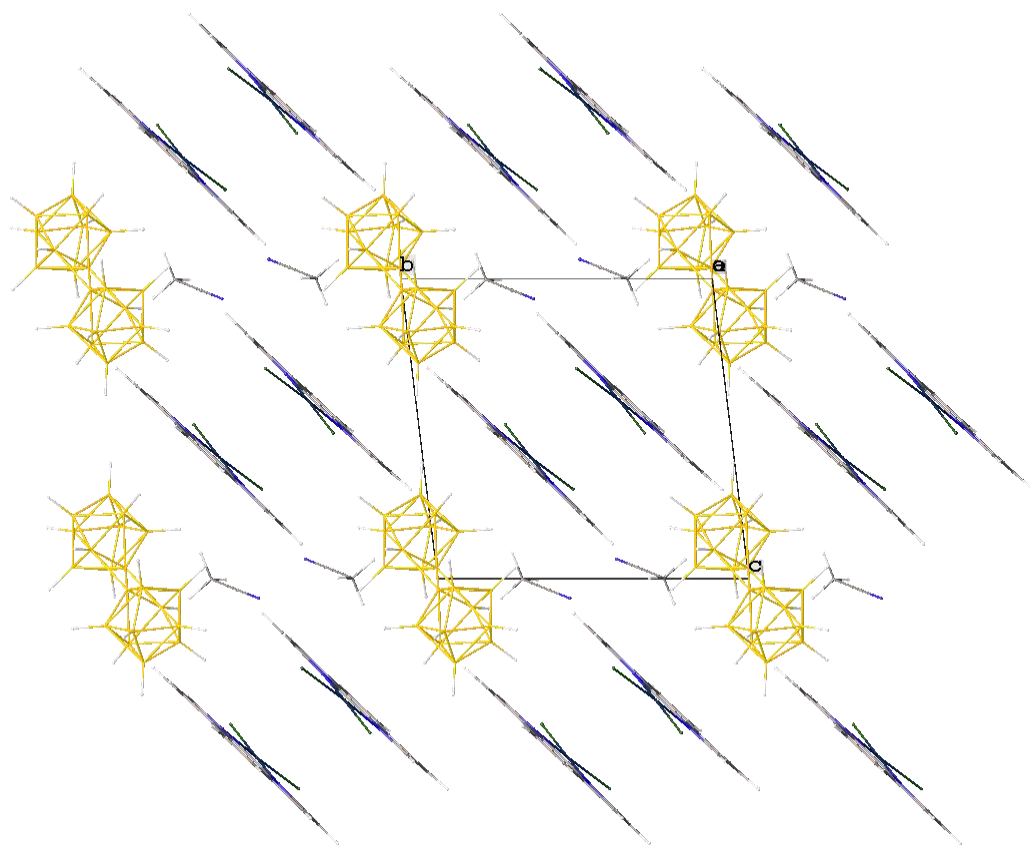

**Figure S5.** Crystal packing of **2**·2CH<sub>3</sub>CN.

**Table S1.** Crystal structure data and refinement details for **1**·2CH<sub>3</sub>CN and **2**·2CH<sub>3</sub>CN.

| Complex                                                                                              | <b>1</b> ·2CH <sub>3</sub> CN                                                                  |
|------------------------------------------------------------------------------------------------------|------------------------------------------------------------------------------------------------|
| Composition                                                                                          | C <sub>24</sub> H <sub>40</sub> Au <sub>2</sub> B <sub>20</sub> Cl <sub>4</sub> N <sub>6</sub> |
| F <sub>w</sub>                                                                                       | 1164.55                                                                                        |
| Crystal system                                                                                       | orthorhombic                                                                                   |
| Space group                                                                                          | Pbca                                                                                           |
| <i>a</i> , Å                                                                                         | 15.99(3)                                                                                       |
| <i>b</i> , Å                                                                                         | 15.83(3)                                                                                       |
| <i>c</i> , Å                                                                                         | 16.89(3)                                                                                       |
| $\beta$ , °                                                                                          | 90                                                                                             |
| <i>V</i> , Å <sup>3</sup>                                                                            | 4276(14)                                                                                       |
| <i>Z</i>                                                                                             | 4                                                                                              |
| <i>D</i> <sub>calcd</sub> , g cm <sup>-3</sup>                                                       | 1.809                                                                                          |
| $\mu$ (MoK $\alpha$ ), cm <sup>-1</sup>                                                              | 7.134                                                                                          |
| <i>F</i> (000), e                                                                                    | 2208                                                                                           |
| <i>hkl</i> range                                                                                     | -21 ≤ <i>h</i> ≤ 13<br>-22 ≤ <i>k</i> ≤ 20<br>-24 ≤ <i>l</i> ≤ 17                              |
| Refl. measured                                                                                       | 17033                                                                                          |
| Refl. unique                                                                                         | 6323                                                                                           |
| Refl. observed                                                                                       | 3519                                                                                           |
| <i>R</i> <sub>int</sub>                                                                              | 0.197                                                                                          |
| Param. refined / constr                                                                              | 254 / 36                                                                                       |
| <i>R</i> ( <i>F</i> )/ <i>wR</i> ( <i>F</i> <sup>2</sup> ) <sup>a</sup> ( <i>I</i> > 2σ( <i>I</i> )) | 0.060 / 0.134                                                                                  |
| <i>R</i> ( <i>F</i> )/ <i>wR</i> ( <i>F</i> <sup>2</sup> ) <sup>a</sup> (all refl.)                  | 0.110 / 0.152                                                                                  |
| GoF ( <i>F</i> <sup>2</sup> ) <sup>b</sup>                                                           | 0.95                                                                                           |
| $\Delta\rho_{\text{fin}}$ (max/min), e Å <sup>-3</sup>                                               | 5.05/-3.18                                                                                     |

<sup>a</sup>  $R1 = \frac{\sum |F_o| - \sum |F_c|}{\sum |F_o|}$ ,  $wR2 = \left[ \frac{\sum w(F_o^2 - F_c^2)^2}{\sum w(F_o^2)^2} \right]^{1/2}$ ,  $w = \left[ \sigma^2(F_o^2) + (0.05P)^2 \right]^{-1}$ , where  $P = (\text{Max}(F_o^2, 0) + 2F_c^2)/3$ ; <sup>b</sup>  $\text{GoF} = \left[ \frac{\sum w(F_o^2 - F_c^2)^2}{(n_{\text{obs}} - n_{\text{param}})} \right]^{1/2}$

|                                                                                                      |                                                                                                |
|------------------------------------------------------------------------------------------------------|------------------------------------------------------------------------------------------------|
| Complex                                                                                              | <b>2·2CH<sub>3</sub>CN</b>                                                                     |
| Composition                                                                                          | C <sub>28</sub> H <sub>40</sub> Au <sub>2</sub> B <sub>20</sub> Cl <sub>4</sub> N <sub>6</sub> |
| F <sub>w</sub>                                                                                       | 1212.59                                                                                        |
| Crystal system                                                                                       | triclinic                                                                                      |
| Space group                                                                                          | P-1                                                                                            |
| <i>a</i> , Å                                                                                         | 10.350(14)                                                                                     |
| <i>b</i> , Å                                                                                         | 10.817(14)                                                                                     |
| <i>c</i> , Å                                                                                         | 11.037(11)                                                                                     |
| $\alpha$ , °                                                                                         | 92.56(5)                                                                                       |
| $\beta$ , °                                                                                          | 110.69(5)                                                                                      |
| $\gamma$ , °                                                                                         | 100.88(6)                                                                                      |
| <i>V</i> , Å <sup>3</sup>                                                                            | 1127(2)                                                                                        |
| <i>Z</i>                                                                                             | 1                                                                                              |
| <i>D</i> <sub>calcd</sub> , g cm <sup>-3</sup>                                                       | 1.787                                                                                          |
| $\mu(\text{MoK}\alpha)$ , cm <sup>-1</sup>                                                           | 6.772                                                                                          |
| <i>F</i> (000), e                                                                                    | 576.0                                                                                          |
| <i>hkl</i> range                                                                                     | -12 ≤ <i>h</i> ≤ 12<br>-13 ≤ <i>k</i> ≤ 13<br>-11 ≤ <i>l</i> ≤ 13                              |
| Refl. measured                                                                                       | 12068                                                                                          |
| Refl. unique                                                                                         | 4409                                                                                           |
| Refl. observed                                                                                       | 3680                                                                                           |
| <i>R</i> <sub>int</sub>                                                                              | 0.0571                                                                                         |
| Param. refined / constr                                                                              | 254 / 0                                                                                        |
| <i>R</i> ( <i>F</i> )/ <i>wR</i> ( <i>F</i> <sup>2</sup> ) <sup>a</sup> ( <i>I</i> > 2σ( <i>I</i> )) | 0.0489/ 0.0728                                                                                 |
| <i>R</i> ( <i>F</i> )/ <i>wR</i> ( <i>F</i> <sup>2</sup> ) <sup>a</sup> (all refl.)                  | 0.0633/ 0.0779                                                                                 |
| GoF ( <i>F</i> <sup>2</sup> ) <sup>b</sup>                                                           | 1.135                                                                                          |
| $\Delta\rho_{\text{fin}}$ (max/min), e Å <sup>-3</sup>                                               | 1.73/-2.06                                                                                     |

<sup>a</sup>  $R1 = \frac{\sum ||F_o| - |F_c||}{\sum |F_o|}$ ,  $wR2 = \frac{[\sum w(F_o^2 - F_c^2)^2]}{[\sum w(F_o^2)^2]}^{1/2}$ ,  $w = [\sigma^2(F_o^2) + (0.05P)^2]^{-1}$ , where  $P = (\text{Max}(F_o^2, 0) + 2F_c^2)/3$ ; <sup>b</sup>  $\text{GoF} = [\sum w(F_o^2 - F_c^2)^2 / (n_{\text{obs}} - n_{\text{param}})]^{1/2}$
